# Supplementary material for: Plastid genomics of Nicotiana (Solanaceae): insights into molecular evolution, positive selection and the origin of the maternal genome of Aztec tobacco (Nicotiana rustica)
Source: PeerJ. 2020 Jul 23;8:e9552. doi: 10.7717/peerj.9552 (PMC7382938; doi:10.7717/peerj.9552)
Supplement: Table S1 — Shows percentage in total and for each region separately. [file peerj-08-9552-s001.docx]

**Table S1** Summary statistics of chloroplast genomes *Nicotiana knightiana, Nicotiana rustica, Nicotiana paniculata, Nicotiana obtusifolia, Nicotiana glauca*

| **Characteristics** | | ***Nicotiana knightiana*** | ***Nicotiana rustica*** | ***Nicotiana paniculata*** | ***Nicotiana obtusifolia*** | ***Nicotiana glauca*** |
| --- | --- | --- | --- | --- | --- | --- |
| Accession No. | | BK010737 | BK010738 | BK010741 | BK010739 | BK010740 |
| Coverage depth | | 811 | 1,951 | 1,032 | 1,412 | 327 |
| Size (base pair; bp) | | 155,963 | 155,850 | 155,689 | 156,022 | 155,917 |
| LSC length (bp) | | 86,682 | 86,612 | 86,510 | 86,609 | 86,716 |
| SSC length (bp) | | 18,551 | 18,551 | 18,441 | 18,541 | 18,555 |
| IR length (bp) | | 25,364 | 25,343 | 25,369 | 25,436 | 25,323 |
| Number of genes | | 133 | 133 | 133 | 133 | 133 |
| Protein-coding genes | | 85 | 85 | 85 | 85 | 85 |
| tRNA genes | | 37 | 37 | 37 | 37 | 37 |
| rRNA genes | | 8 | 8 | 8 | 8 | 8 |
| Duplicate genes | | 18 | 18 | 18 | 18 | 18 |
| GC content | Total (%) | 37.1% | 37.8% | 37.9% | 37.8% | 37.8% |
| LSC (%) | 35.9% | 35.9% | 35.9% | 35.9% | 36% |
| SSC (%) | 32.1% | 32.1% | 32.2% | 31.9% | 32.1% |
| IR (%) | 43.2% | 43.2% | 43.2% | 43.2% | 43.2% |
| CDS (%) | 38.2% | 38.2% | 38.2% | 38.1% | 38.2% |
| rRNA (%) | 55.3% | 55.4% | 55.3% | 55.2% | 55.1% |
| tRNA (%) | 52.9% | 52.9% | 52.9% | 52.9% | 52.9% |
| All gene % | 39.8% | 39.9% | 39.8% | 39.7% | 39.8% |
| Protein coding part (CDS) (%bp) | | 52.6% | 50.2% | 51.7% | 51.6% | 38.2% |
| All gene (%bp) | | 70.43% | 70.72% | 72.04% | 71.99% | 71.96% |
| Non-coding region (%bp) | | 29.57% | 29.28% | 27.95% | 28.01% | 28.04% |
